# Supplementary material
Source: PubMed Central journal article supplement (PMC4512924)
Supplement: NIHMS672850-supplement-13365_2015_334_MOESM3_ESM.pdf [file NIHMS672850-supplement-13365_2015_334_MOESM3_ESM.pdf]

# CSF

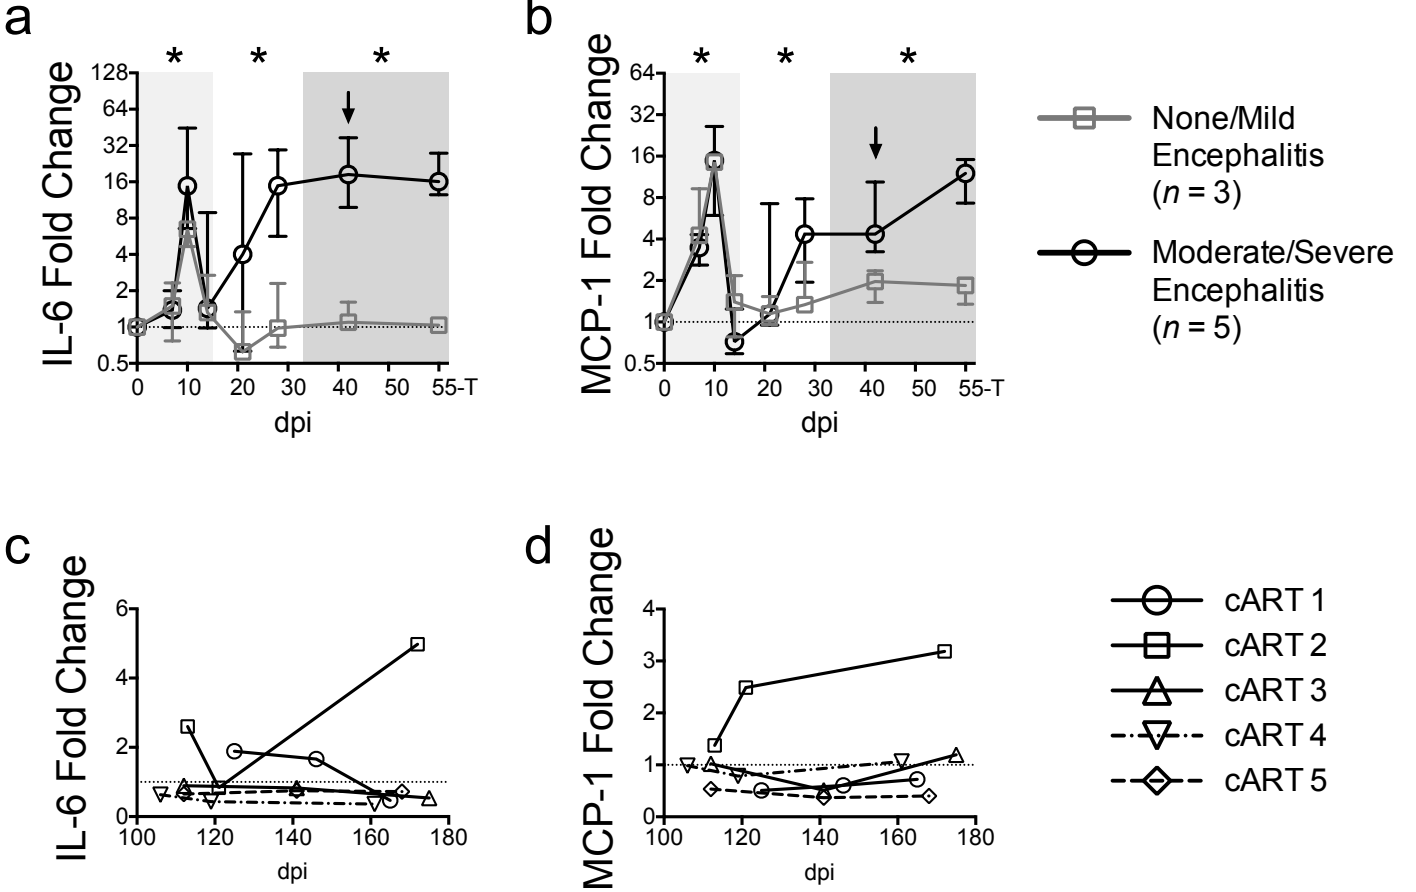

**Fig. S2** Longitudinal CSF IL-6 and MCP-1 fold change data. CSF from the same 8 animals as in Figure 2 were analyzed by ELISA for IL-6 (**a**) and MCP-1 (**b**). Data and statistics were performed identically to those in Figure 2, with asterisks representing the phases of infection at which these analytes were significantly different from pre-infection values, and downward arrows indicating the earliest time point at which fold changes were significantly different between animals that developed moderate to severe encephalitis (N = 5) and those that developed no or only mild encephalitis (N = 3). CSF from the same 5 infected, cART-treated animals as in Figure 6 were analyzed by ELISA for IL-6 (**c**) and MCP-1 (**d**). Data are presented as fold changes over the average of pre-infection values for each analyte.
